# Supplementary material
Source: publisher figshare collection journal article supplement (https://gsapubs.figshare.com/ndownloader/files/25794659)
Supplement: Supplementary file 1 [file 25794659]

Sample name	Longitude	Latitude	Formation	Drillhole depth (m)
Areyonga	135.29796	-23.78139	Areyonga Fm.	NA
BSA	137.72828	-23.15964	Black Stump Arkose	NA
Mcdills25	135.7903	-25.7306	Horn Valley Siltstone (presumed)	2535 m (8316 ft)
Mcdills27	135.7903	-25.7306	Horn Valley Siltstone (presumed)	2718 m (8918 ft)
MTCAP	134.61699	-24.05426	Olympic Fm.	NA
MTL	134.99657	-23.90425	Olympic Fm.	NA
MW	138.954	-22.971	Yardida Tillite	Multiple small samples between ~300 and 800 m
OFWM	132.3797	-23.59844	Olympic Fm.	NA
ORD	134.494	-23.584	Olympic Fm.	NA
Trephina	134.39802	-23.52039	Modern sand	NA
VIN1	128.25222	-26.70139	Wahlgu Fm.	765 m
VIN2	128.25222	-26.70139	Wahlgu Fm.	314 m
VIN4	123.75571	-25.04593	Wahlgu Fm.	365.5 m (Lancer 1)
